# Supplementary material
Source: Springer Nature journal article supplement (https://www.springermedizin.de/resource/supplementary/13256_2008_573_MOESM1_ESM.pdf/9646282)

2007-01-03

13:45:52

SL:7.00 thk 9.00 sp

SP: -73.86

PP:FFS

Srs:3

Img:15

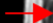

FoV:460 x 460

[L]

19 Cm

[F]

L:290

W:563

Supplement: MOESM1 [file 9646282]
